# Supplementary material for: Effects of bifunctional metal sulfide interlayers on photovoltaic properties of organic–inorganic hybrid solar cells
Source: Royal Society of Chemistry journal article supplement (doi:10.1039/c3ra23055d), 2013-01-01
Supplement: c3ra23055d.pdf [file c3ra23055d.pdf]

## Supporting Information

### Effects of bifunctional metal sulfide interlayers on photovoltaic properties of organic-inorganic hybrid solar cells

*B. Reeja-Jayan and Arumugam Manthiram\**  
*Materials Science and Engineering Program*  
*The University of Texas at Austin*  
*Austin, Texas 78712, USA*

#### 1. SEM images of metal sulfide layers

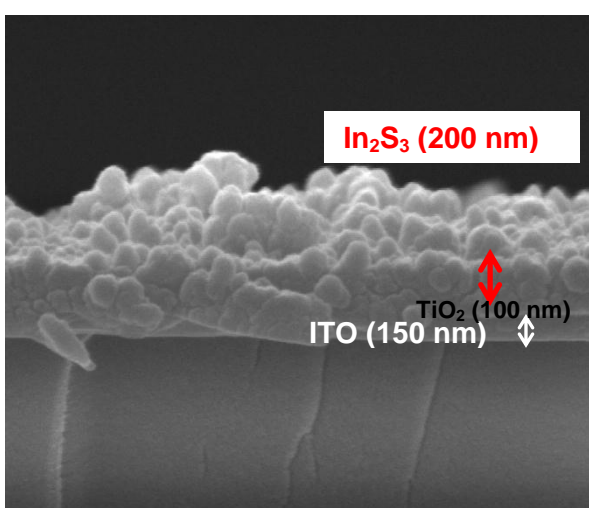

Fig. S1. Cross-sectional SEM image of In<sub>2</sub>S<sub>3</sub> films (90 min) on TiO<sub>2</sub>-coated ITO-glass substrates.

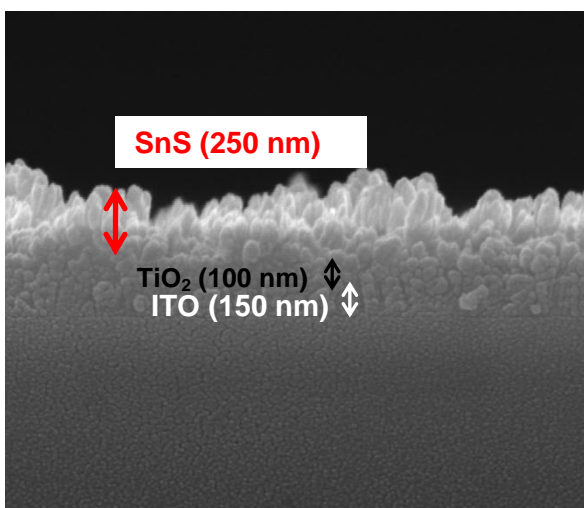

Fig. S2: Cross-sectional SEM image of SnS films (80 min) on TiO<sub>2</sub>-coated ITO-glass substrates.

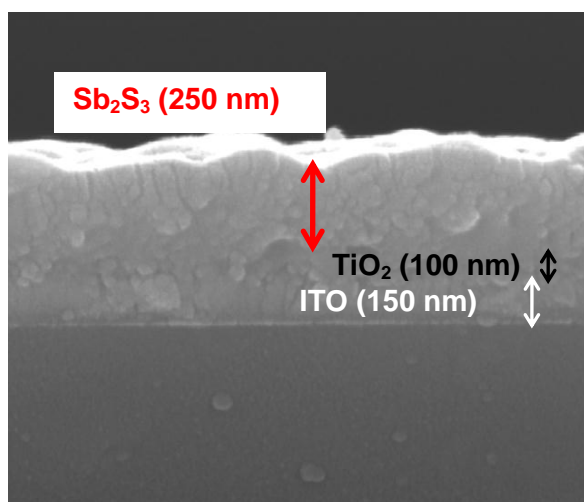

Fig. S3: Cross-sectional SEM image of  $\text{Sb}_2\text{S}_3$  films (16 h) on  $\text{TiO}_2$ -coated ITO-glass substrates.

## 2. Determination of the absorption coefficient of metal sulfide layers

The absorption coefficient  $\alpha$  (as a function of wavelength) was estimated using equation S1 [ref. 20 in the main manuscript]

$$\alpha = \frac{2.303 \text{ Abs}}{t} \quad (\text{S1})$$

where, Abs is the measured absorbance (as a function of wavelength) and  $t$  is the thickness of the metal sulfide film. For thickness calibration, the thickness  $t$  of all metal sulfide layers were  $\sim 250$  nm. For background correction, the absorption spectra for the glass substrate, 150 nm thick ITO films and 100 nm thick  $\text{TiO}_2$  films were obtained, and then subtracted from the metal sulfide spectra.

## 3. Determination of the band gap of metal sulfide layers

The direct energy bandgap was calculated using equation S2 [ref. 20 in the main manuscript]

$$(\alpha h\nu)^2 = A(E_g - h\nu) \quad (\text{S2})$$

The plot of  $(\alpha h\nu)^2$  as a function of photon energy  $h\nu$  is shown in Figure S4. The energy bandgap ( $E_g$ ) was obtained by extrapolating the linear portion of this plot to intersect the energy ( $h\nu$ ) axis.

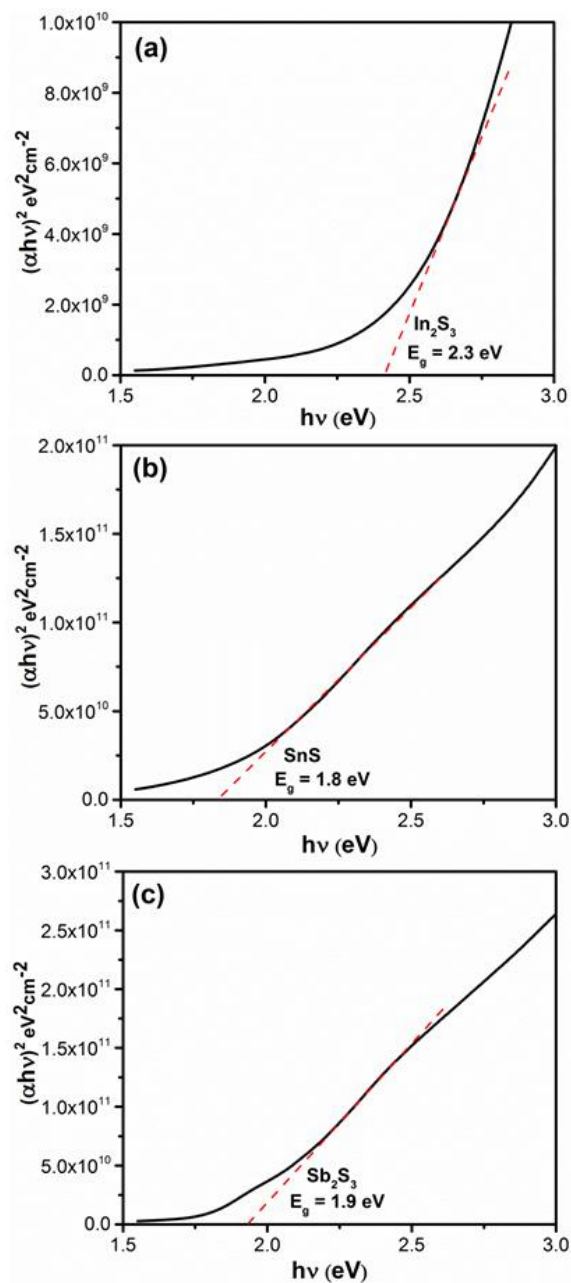

Fig. S4: Band gap calculation for (a)  $\text{In}_2\text{S}_3$ , (b)  $\text{SnS}$ , and (c)  $\text{Sb}_2\text{S}_3$  metal films.  $\text{TiO}_2$ -coated ITO glass substrates were used as background reference, and their spectra were subtracted.

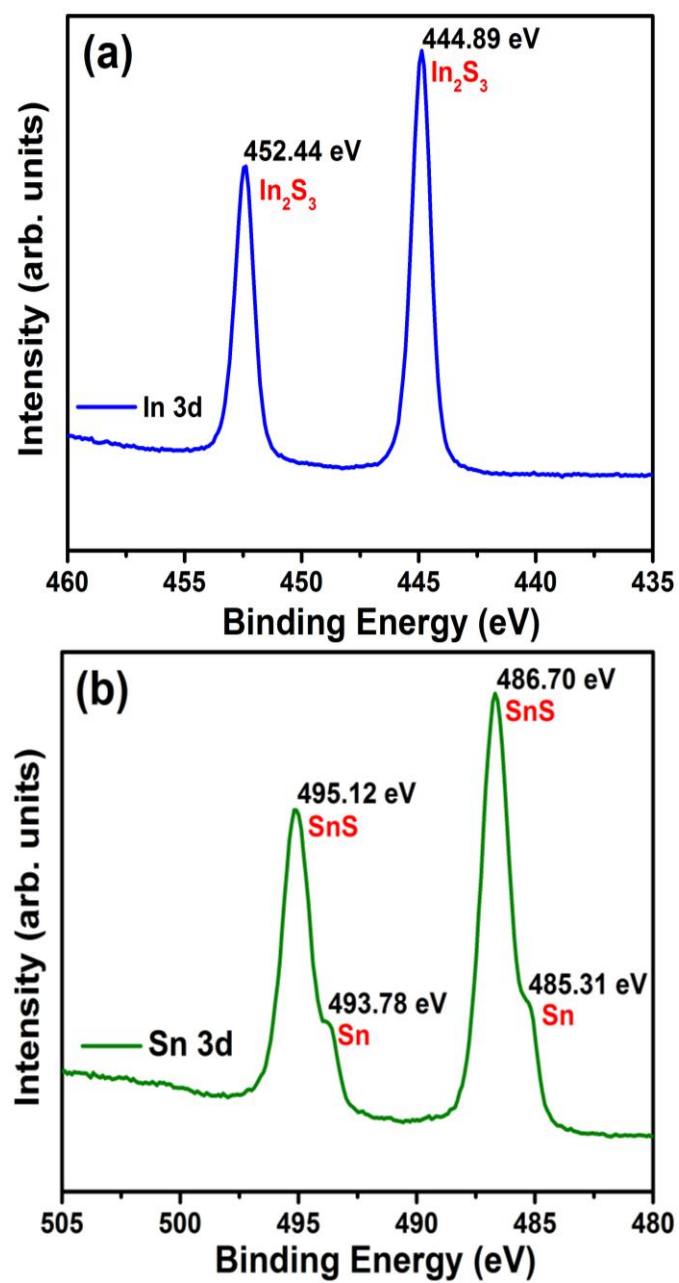

Fig. S5: XPS metal 3d spectra of (a) In and (b) Sn on surface of metal sulfides.
